# Supplementary material for: Ultralow-voltage and high gain photoconductor based on ZnS:Ga nanoribbons for the detection of low-intensity ultraviolet light
Source: Royal Society of Chemistry journal article supplement (doi:10.1039/c3tc32310b), 2014-01-01
Supplement: c3tc32310b1.pdf [file c3tc32310b1.pdf]

### SUPPORTING INFORMATION

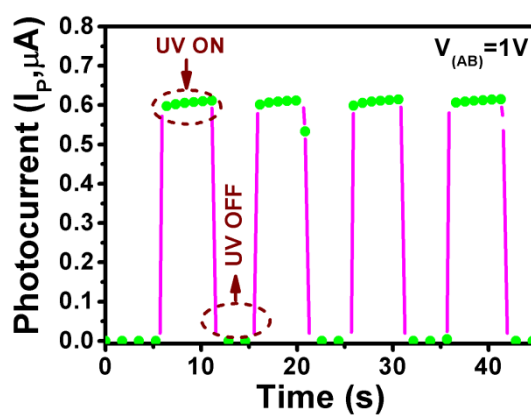

Figure S1. Time response of the nanoPCDs under UV light illumination ( $1 \mu\text{Wcm}^{-2}$ ) under a bias of 1 V.
